# Supplementary material for: Cost-effectiveness analysis of COPD screening programs in primary care for high-risk patients in China
Source: PubMed Central journal article supplement (PMC8137942; doi:10.1038/s41533-021-00233-z), 2021-05-20
Supplement: 41533_2021_233_MOESM2_ESM.pdf [file 41533_2021_233_MOESM2_ESM.pdf]

## Supplementary file

Supplementary Table 1. The values of sensitivity and specificity of different screening approaches and probabilities of discovering COPD during disease progression in probabilistic sensitivity analyses

| Parameter                              | Values in base case | PSA                                                  |
|----------------------------------------|---------------------|------------------------------------------------------|
|                                        |                     | Distribution ( $\alpha$ , $\beta$ ) or ( $\mu$ , sd) |
| Characteristics of questionnaire       |                     |                                                      |
| Sensitivity                            | 87.50%              | Beta (47.14, 6.73)                                   |
| Specificity                            | 38.80%              | Beta (234.72, 370.23)                                |
| Characteristics of portable spirometer |                     |                                                      |
| Sensitivity                            | 99.90%              | Beta (0.54, 0.054)                                   |
| Specificity                            | 97.70%              | Beta (22.18, 0.52)                                   |

<sup>1</sup> the annual detected probability was transformed to monthly probability when used in the model. The transformed equation is:  $\text{monthly probability} = 1 - \exp(\ln(1 - \text{annual probability})/12)$ .

Supplementary Table 2. The values of screening cohort characteristics in probabilistic sensitivity analyses

| Parameter                                                        | Values in base case | PSA                                               |
|------------------------------------------------------------------|---------------------|---------------------------------------------------|
|                                                                  |                     | Distribution ( $\alpha, \beta$ ) or ( $\mu, sd$ ) |
| Probability that a patient with chronic bronchitis (CB) has COPD | 31.37%              | Beta (65.60, 143.51)                              |
| Proportion of diagnosed COPD patients being mild                 | 31.38%              | Dirichlet (65.59, 143.44)                         |
| Proportion of diagnosed COPD patients being moderate             | 46.04%              | Dirichlet (51.36, 60.19)                          |
| Proportion of diagnosed COPD patients being severe/very severe   | 22.58%              | Dirichlet (74.13, 254.15)                         |
| Average age of diagnosed COPD patients                           | 59.59               | Normal (59.59, 6.08)                              |
| % females in CB with COPD                                        | 23.46%              | Beta (73.27, 239.06)                              |
| % females in CB without COPD                                     | 35.39%              | Beta (61.70, 112.65)                              |
| Height (females)                                                 | 155.80              | Normal (155.80, 7.95)                             |
| Height (males)                                                   | 167.10              | Normal (167.10, 8.53)                             |

Supplementary Table 3. The values of clinical inputs of the Markov model in probabilistic sensitivity analyses

| Parameter                                                 | Values in base case | PSA                                                  |
|-----------------------------------------------------------|---------------------|------------------------------------------------------|
|                                                           |                     | Distribution ( $\alpha$ , $\beta$ ) or ( $\mu$ , sd) |
| COPD FEV <sub>1</sub> Decline (L/year) <sup>1</sup>       | 0.041               | Normal (0.041, 0.0042)                               |
| Annual probability to discover COPD from "undetected"‡    |                     |                                                      |
| Mild COPD                                                 | 20.00%              | Beta (76.63, 306.53)                                 |
| Moderate COPD                                             | 50.00%              | Beta (47.52, 47.52)                                  |
| Severe/very severe COPD                                   | 90.00%              | Beta (14.98, 1.66)                                   |
| Treatment effects (mean L/month)                          |                     |                                                      |
| LAMA+LABA                                                 | 0.026               | Normal (0.026, 0.0027)                               |
| LABA+ICS                                                  | 0.031               | Normal (0.031, 0.0031)                               |
| LABA alone                                                | 0.013               | Normal (0.013, 0.0013)                               |
| LAMA alone                                                | 0.022               | Normal (0.022, 0.0023)                               |
| LABA+LAMA+ICS                                             | 0.025               | Normal (0.025, 0.0025)                               |
| % COPD patient to develop exacerbation                    |                     |                                                      |
| Mild COPD                                                 | 19.00%              | Beta (77.6, 330.83)                                  |
| Moderate COPD                                             | 19.00%              | Beta (77.6, 330.83)                                  |
| Severe/very severe COPD                                   | 26.50%              | Beta (70.32, 195.05)                                 |
| Probability of hospitalization due to severe exacerbation |                     |                                                      |
| Mild COPD                                                 | 68.42%              | Beta (29.64, 13.68)                                  |
| Moderate COPD                                             | 68.42%              | Beta (29.64, 13.68)                                  |
| Severe/very severe COPD                                   | 66.04%              | Beta (31.96, 16.44)                                  |
| Mortality of severe exacerbation                          | 1.28%               | Beta (0.26, 20.17)                                   |
| Risk of serious pneumonia                                 |                     |                                                      |
| Monthly incidence of serious pneumonia                    | 0.20%               | Beta (95.84, 46694.81)                               |
| Mortality of serious pneumonia                            | 3.33%               | Beta (92.81, 2696.17)                                |

<sup>1</sup> the FEV<sub>1</sub> decline rate was transformed to L/month when used in the model. The transformed equation is: decline rate (L/month) = decline rate (L/year)/12.

SABA: short acting beta agonists; SAMA: short acting muscarinic antagonists; LAMA: long acting muscarinic antagonists; LABA: long acting beta agonists; ICS: inhaled corticosteroids

Supplementary Table 4. The values of cost input in probabilistic sensitivity analyses

| Parameter (¥)                                | Values in base case | PSA                                                  |
|----------------------------------------------|---------------------|------------------------------------------------------|
|                                              |                     | Distribution ( $\alpha$ , $\beta$ ) or ( $\mu$ , sd) |
| Drug costs per month                         |                     |                                                      |
| LAMA+LABA                                    | ¥642                | Gamma (1, 641.77)                                    |
| LABA+ICS                                     | ¥114                | Gamma (1, 113.54)                                    |
| LABA alone                                   | ¥124                | Gamma (1, 124.03)                                    |
| LAMA alone                                   | ¥253                | Gamma (1, 252.66)                                    |
| LABA+LAMA+ICS                                | ¥366                | Gamma (1, 366.20)                                    |
| Cost of COPD maintenance treatment per month |                     |                                                      |
| Mild COPD                                    | ¥23                 | Gamma (1, 22.67)                                     |
| Moderate COPD                                | ¥67                 | Gamma (1, 67.37)                                     |
| Severe/very severe COPD                      | ¥187                | Gamma (1, 187.17)                                    |
| Cost of chronic bronchitis treatment         | ¥275                | Gamma (1, 275)                                       |
| AE costs                                     |                     |                                                      |
| cost of exacerbation                         |                     |                                                      |
| Treated in inpatient                         |                     |                                                      |
| Mild COPD                                    | ¥8,639              | Gamma (1, 8638.50)                                   |
| Moderate COPD                                | ¥17,277             | Gamma (1, 17277.00)                                  |
| Severe/very severe COPD                      | ¥25,915             | Gamma (1, 25915.50)                                  |
| Treated in outpatient                        |                     |                                                      |
| Cost of pneumonia                            | ¥32,394             | Gamma (1, 32394.38)                                  |
| Screening and diagnosis costs                |                     |                                                      |
| Cost of portable spirometer screening        | ¥34                 | Gamma (1, 34.00)                                     |
| Cost of questionnaire screening              | ¥8                  | Gamma (1, 7.50)                                      |
| Cost of additional tests to confirm COPD     | ¥220                | Gamma (1, 220.00)                                    |

*KOL: key opinion leader; SABA: short acting beta agonists; SAMA: short acting muscarinic antagonists; LAMA: long acting muscarinic antagonists; LABA: long acting beta agonists; ICS: inhaled corticosteroids*

Supplementary Table 5. The values of utility and discount rate in probabilistic sensitivity analyses

| Parameter                                 | Value in base case | PSA                                                  |
|-------------------------------------------|--------------------|------------------------------------------------------|
|                                           |                    | Distribution ( $\alpha$ , $\beta$ ) or ( $\mu$ , sd) |
| Utility                                   |                    |                                                      |
| Mild COPD                                 | 0.81               | Beta (17.44, 4.09)                                   |
| Moderate COPD                             | 0.72               | Beta (26.17, 10.18)                                  |
| Severe/very severe COPD                   | 0.67               | Beta (31.02, 15.28)                                  |
| Correction for exacerbation in outpatient | 0.85               | Beta (13.56, 2.39)                                   |
| Correction for exacerbation in inpatient  | 0.50               | Beta (47.52, 47.52)                                  |
| Correction for serious pneumonia          | 0.50               | Beta (47.52, 47.52)                                  |
| Discount Rate                             |                    |                                                      |
| Effect                                    | 3.5%               | Normal (0.035, 0.013)                                |
| Costs                                     | 3.5%               | Normal (0.035, 0.013)                                |

Supplementary Table 6. Reported FEV<sub>1</sub> improvement of COPD treatments

| COPD treatment    | Intervention          | Mean<br>(ml/weeks) | Mean<br>(ml/month) | Mean<br>(L/month) | Reference <sup>1</sup> |
|-------------------|-----------------------|--------------------|--------------------|-------------------|------------------------|
| LAMA + LABA       | GFF 18/9.6ug          | 165.000            | 29.874             | 0.030             | 1                      |
|                   | IndaGlyco 110/50ug    | 123.530            | 22.365             | 0.022             | 2                      |
| LABA + ICS        | FFVI 100/25ug         | 180.000            | 32.589             | 0.033             | 3                      |
|                   | FFVI 50/25ug          | 140.000            | 25.347             | 0.025             | 3                      |
|                   | FFVI 200/25ug         | 190.000            | 34.400             | 0.034             | 3                      |
|                   | SFC 500 /twice a day  | 115.980            | 20.998             | 0.021             | 2                      |
| LABA alone        | FF 9.6ug              | 72.000             | 13.036             | 0.013             | 1                      |
| LAMA alone        | GP 18ug               | 59.000             | 10.682             | 0.011             | 1                      |
|                   | Glyco 50ug            | 137.000            | 24.804             | 0.025             | 4                      |
|                   | Tio 5ug               | 69.000             | 12.493             | 0.012             | 5                      |
|                   | Tio 18ug              | 230.000            | 41.642             | 0.042             | 6                      |
| LABA + LAMA + ICS | 320/18/9.6 µg BGF MDI | 147.000            | 26.615             | 0.027             | 7                      |
|                   | 18/9.6 µg GFF MDI     | 125.000            | 22.631             | 0.023             | 7                      |

<sup>1</sup> All the trials were conducted in Asian population and lasted 24 weeks at least

SABA: short acting beta agonists; SAMA: short acting muscarinic antagonists; LAMA: long acting muscarinic antagonists; LABA: long acting beta agonists; ICS: inhaled corticosteroids.

GFF: glycopyrrolate/formoterol fumarate; IndaGlyco: indacaterol/glycopyrronium; FFVI: fluticasone/vilanterol; SFC: fluticasone/salmeterol; FF: formoterol fumarate; GP: glycopyrrolate; Glyco: glycopyrronium; Tio: tiotropium; BGF: budesonide/glycopyrrolate/formoterol; MDI: metered-dose inhaler

Supplementary Table 7. Maintenance cost (per month) for each health state

| Item                                                   | unit cost | Resource using times per patient per 3 months |          |                    |
|--------------------------------------------------------|-----------|-----------------------------------------------|----------|--------------------|
|                                                        |           | mild                                          | moderate | severe/very severe |
| Drug cost                                              |           |                                               |          |                    |
| Influenza vaccination                                  | ¥83.98    | 0.25                                          | 0.25     | 0.25               |
| Phlegm agent                                           | ¥3.375    | 0                                             | 39.74    | 64.455             |
| Oxygen therapy                                         | ¥3.75     | 0                                             | 0        | 61.065             |
| Medical service                                        |           |                                               |          |                    |
| Clinican service/ per visit for respiratory department | ¥50       | 0.5                                           | 0.5      | 1                  |
| Lab examination                                        |           |                                               |          |                    |
| Lung volume examination                                | ¥44       | 0.5                                           | 0.5      | 1                  |
| Maintenance Cost per 3 months                          |           | ¥67.995                                       | ¥202.12  | ¥561.52            |
| Maintenance Cost per month                             |           | ¥22.67                                        | ¥67.37   | ¥187.17            |

\* cited from Fan 2016<sup>8</sup> and adjusted by local clinical experts

Supplementary Table 8. Diagnosis cost (in CNY)

| Item               | Cost |
|--------------------|------|
| Outpatient fee     | 50   |
| Bronchodilators    | 25   |
| Lung function test | 75   |
| Chest X-ray        | 70   |
| Total              | 220  |

\* provided by local clinical experts



Supplementary Table 9. Screening cost (in CNY)

The average wage of clinicians in primary care is ¥60,000. Assumed 250 working days per annum and 8 working hours per day. Therefore, the average labor cost per minute is  $¥60,000 / (250 * 8 * 60) = ¥0.5$ .

|                                   | Questionnaire                               | Portable spirometer                         |
|-----------------------------------|---------------------------------------------|---------------------------------------------|
| Unit price                        | ¥0                                          | ¥35,000                                     |
| Service life year                 | -                                           | 3 years                                     |
| Cost of consumable items          | ¥0                                          | ¥25                                         |
| Time for screening                | 15 min                                      | 15 min                                      |
| Labor cost per minute             | ¥0.5                                        | ¥0.5                                        |
| <b>Screening cost per patient</b> |                                             |                                             |
| Labor cost                        | $15 \text{ min} * ¥0.5 / \text{min} = ¥7.5$ | $15 \text{ min} * ¥0.5 / \text{min} = ¥7.5$ |
| Depreciation                      | 0                                           | $¥35,000 / (3 * 250 * 8 * 60 / 15) = ¥1.5$  |
| Consumable items                  | 0                                           | ¥25                                         |
| Total                             | ¥7.5                                        | ¥34                                         |

## Reference

<sup>1</sup>Lipworth BJ, Collier DJ, Gon Y, Zhong N, Nishi K, Chen R, et al. Improved lung function and patient-reported outcomes with co-suspension delivery technology glycopyrrolate/formoterol fumarate metered dose inhaler in COPD: a randomized Phase III study conducted in Asia, Europe, and the USA. *International journal of chronic obstructive pulmonary disease*. 2018;13:2969.

<sup>2</sup>Zhong N, Wang C, Zhou X, Zhang N, Humphries M, Wang L, et al. Efficacy and safety of indacaterol/glycopyrronium (IND/GLY) versus salmeterol/fluticasone in Chinese patients with moderate-to-severe chronic obstructive pulmonary disease: the Chinese cohort from the LANTERN study. *COPD: Journal of Chronic Obstructive Pulmonary Disease*. 2016;13(6):686-92.

<sup>3</sup>Zheng J, de Guia T, Wang-Jairaj J, Newlands AH, Wang C, Crim C, et al. Efficacy and safety of fluticasone furoate/vilanterol (50/25 mcg; 100/25 mcg; 200/25 mcg) in Asian patients with chronic obstructive pulmonary disease: a randomized placebo-controlled trial. *Current medical research and opinion*. 2015;31(6):1191-200.

<sup>4</sup>Wang C, Sun T, Huang Y, Humphries M, Bai L, Li L, et al. Efficacy and safety of once-daily glycopyrronium in predominantly Chinese patients with moderate-to-severe chronic obstructive pulmonary disease: the GLOW7 study. *International journal of chronic obstructive pulmonary disease*. 2015;10:57.

<sup>5</sup>Ma J, Zhou Z, Tang Y, Zhong N. The efficacy and safety of low-dose tiotropium bromide inhaled via Respimat in patients with chronic obstructive pulmonary disease. *Chinese Journal of Internal Medicine*. 2014;53(12):964-8.

<sup>6</sup>Wang T, Luo G, Hu Y, Li F, Ma J, Wang J, et al. Comparative study on the efficacy of tiotropium bromide inhalation and oral doxofylline treatment of moderate to severe stable chronic obstructive pulmonary disease. *Journal of Huazhong University of Science and Technology [Medical Sciences]*. 2011;31(5):614.

<sup>7</sup>Ferguson GT, Rabe KF, Martinez FJ, Fabbri LM, Wang C, Ichinose M, et al. Triple therapy with budesonide/glycopyrrolate/formoterol fumarate with co-suspension delivery technology versus dual therapies in chronic obstructive pulmonary disease (KRONOS): a double-blind, parallel-group, multicentre, phase 3 randomised controlled trial. *The Lancet Respiratory Medicine*. 2018;6(10):747-58.

<sup>8</sup>Fan C. The Cost Effectiveness Analysis of Indacaterol versus Tiotropium in Chinese Medical Cost Setting. *Drug Evaluation*. 2016(2016.01):34-9.
